# Supplementary material
Source: publisher figshare collection journal article supplement (https://frontiersin.figshare.com/ndownloader/files/34078238)
Supplement: Supplementary file 1 [file 34078238]

Supplementary Material

# Dictionary of Symbols

**Supplementary Table 1**: Descriptions and units of symbols used in the main text.

| **Symbol** | **Description** | **Unit** |
| --- | --- | --- |
|  | Time average |  |
|  | Canopy spatial vertical average |  |
|  | Wave velocity amplitude | m s-1 |
|  | Depth-averaged imposed current velocity | m s-1 |
|  | Depth-averaged, time-averaged in-canopy velocity | m s-1 |
|  | Depth-averaged, time-averaged overflow layer velocity | m s-1 |
|  | Mean water depth | m |
|  | Undeflected canopy height | m |
|  | Deflected canopy height | m |
|  | Drag coefficient |  |
|  | Canopy frontal area per canopy volume | m-1 |
| / | Number of stems / blades per unit bed area | m-2 |
| / | Stem diameter / blade width | m |
|  | Shear layer penetration depth | m |
|  | Canopy solid volume fraction |  |
|  | Effective blade length | m |
|  | Coefficient of momentum exchange at the top of the canopy |  |
|  | Empirical coefficient used in |  |
|  | Reynolds shear stress at the top of the canopy | kg m-1 s-2 |
|  | Density of water | kg m-3 |
| , , | Streamwise, lateral, and vertical velocity | m s-1 |
| , , | Fluctuations in streamwise, lateral, and vertical velocities | m s-1 |
|  | Time | s |
|  | Vertical coordinate (with at the bed) | m |
|  | Streamwise coordinate  (with at the leading edge of the meadow) | m |
|  | Maximum wave-induced current within the canopy | m s-1 |
|  | Wave number | m-1 |
| / | Wave period / wave angular frequency | s / s-1 |
|  | Shear production | m2 s-3 |
|  | Wake production | m2 s-3 |
|  | Turbulent dissipation rate | m2 s-3 |
| TKE | Turbulent kinetic energy (observed) | m2 s-2 |
|  | Turbulent kinetic energy (predicted) | m2 s-2 |
|  | Integral length scale | m |
|  | Scale factor |  |
|  | Kinematic viscosity of water | m2 s-1 |
|  | Drag length scale | m |

# Experimental Parameters

**Supplementary Table 2**: Experimental parameters for pure wave (‘PW’), pure current (‘PC’), and combined wave-current (‘WC’) conditions. is wave amplitude. The final row includes typical uncertainties.

| **Type** | **(cm)** | **(cm)** | **(s)** | **(cm/s)** | **(cm/s)** |
| --- | --- | --- | --- | --- | --- |
| PW | 27 | 0.8 | 2 | 0 | 0 |
| PW | 27 | 1.3 | 2 | 0 | 0.5 |
| PW | 27 | 1.7 | 2 | 0 | 1.9 |
| PW | 27 | 3.6 | 2 | 0 | 3.5 |
| PC | 27 | 0 | N/A | 4.0 | 0.7 |
| PC | 27 | 0 | N/A | 6.1 | 0.9 |
| PC | 27 | 0 | N/A | 8.2 | 1.5 |
| PC | 27 | 0 | N/A | 10.4 | 1.7 |
| WC | 27 | 0.8 | 2 | 4.0 | 1.0 |
| WC | 27 | 0.6 | 2 | 6.1 | 1.2 |
| WC | 27 | 0.6 | 2 | 8.2 | 1.3 |
| WC | 27 | 0.7 | 2 | 10.4 | 2.1 |
| WC | 27 | 1.2 | 2 | 4.0 | 1.6 |
| WC | 27 | 1.0 | 2 | 6.1 | 1.0 |
| WC | 27 | 0.9 | 2 | 8.2 | 1.6 |
| WC | 27 | 0.7 | 2 | 10.4 | 3.0 |
| WC | 27 | 1.7 | 2 | 4.0 | 2.1 |
| WC | 27 | 1.6 | 2 | 6.1 | 3.2 |
| WC | 27 | 1.6 | 2 | 8.2 | 2.9 |
| WC | 27 | 1.5 | 2 | 10.4 | 3.3 |
| WC | 27 | 3.5 | 2 | 4.0 | 5.9 |
| WC | 27 | 3.3 | 2 | 6.1 | 4.2 |
| WC | 27 | 3.2 | 2 | 8.2 | 4.3 |
| WC | 27 | 3.2 | 2 | 10.4 | 4.0 |
| PW | 45 | 0.9 | 2 | 0 | -0.1 |
| PW | 45 | 1.9 | 2 | 0 | 1.0 |
| PW | 45 | 2.4 | 2 | 0 | 0.6 |
| PW | 45 | 4.0 | 2 | 0 | 2.1 |
| PC | 45 | 0 | N/A | 2.7 | 0.3 |
| PC | 45 | 0 | N/A | 4.1 | 0.3 |
| PC | 45 | 0 | N/A | 5.5 | 0.5 |
| PC | 45 | 0 | N/A | 6.8 | 0.7 |
| WC | 45 | 0.7 | 2 | 2.7 | 0.5 |
| WC | 45 | 0.7 | 2 | 4.1 | 0.4 |
| WC | 45 | 0.6 | 2 | 5.5 | 0.5 |
| WC | 45 | 0.8 | 2 | 6.8 | 0.8 |
| WC | 45 | 1.9 | 2 | 2.7 | 0.9 |
| WC | 45 | 1.8 | 2 | 4.1 | 0.9 |
| WC | 45 | 1.8 | 2 | 5.5 | 1.1 |
| WC | 45 | 1.8 | 2 | 6.8 | 1.5 |
| WC | 45 | 2.3 | 2 | 2.7 | 1.3 |
| WC | 45 | 2.2 | 2 | 4.1 | 1.5 |
| WC | 45 | 2.2 | 2 | 5.5 | 1.3 |
| WC | 45 | 2.2 | 2 | 6.8 | 1.2 |
| WC | 45 | 3.4 | 2 | 2.7 | 2.4 |
| WC | 45 | 3.3 | 2 | 4.1 | 2.8 |
| WC | 45 | 3.3 | 2 | 5.5 | 2.5 |
| WC | 45 | 3.7 | 2 | 6.8 | 5.4 |
|  | 0.2 | 0.1 | 0.02 | 0.2 | 0.1 |

# Time-averaged Velocity, Reynolds Stress, and Turbulent Kinetic Energy Profiles for All Cases

Time-averaged velocity profiles are shown in **Supplementary Figure 3.1**. Pure waves (first column, **Supplementary Figure 3.1(A), (F)**) produce wave-induced time-mean currents within the meadow (in the direction of wave propagation) and return currents above the meadow, resulting in a peak velocity near the top of the meadow. The magnitude of wave-induced current increased as the wave amplitude increased and agreed with the model prediction of Luhar (2021) (see Equation 5 in the main text, and Schaefer and Nepf, 2022, in review).


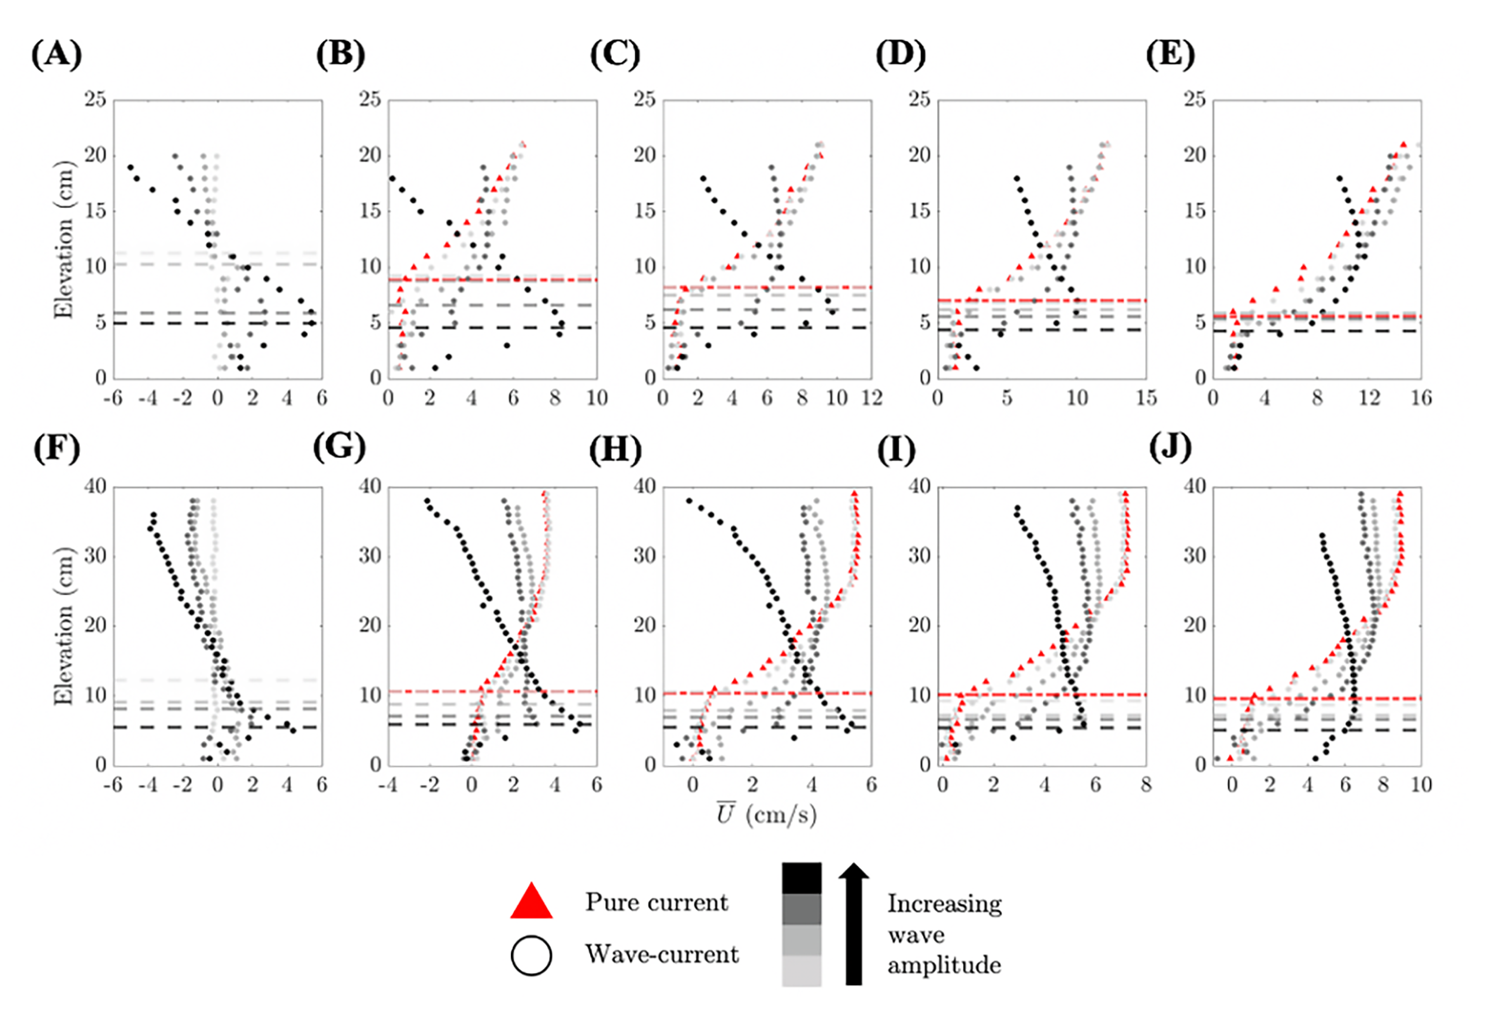


**Supplementary Figure 3.1**: Distance above the bed () versus time-averaged streamwise velocity () for depths **(A-E)** =27 cm and **(F-J)** =45 cm. The first column includes pure wave conditions, and the imposed current increases from the second through fifth columns (see **Supplementary Table 2**). Horizontal dashed lines denote measured , with matching colors (dashed-dotted lines correspond to pure current cases). Profiles could not be extended over the entire depth due to limitations of the instrument and the presence of waves.


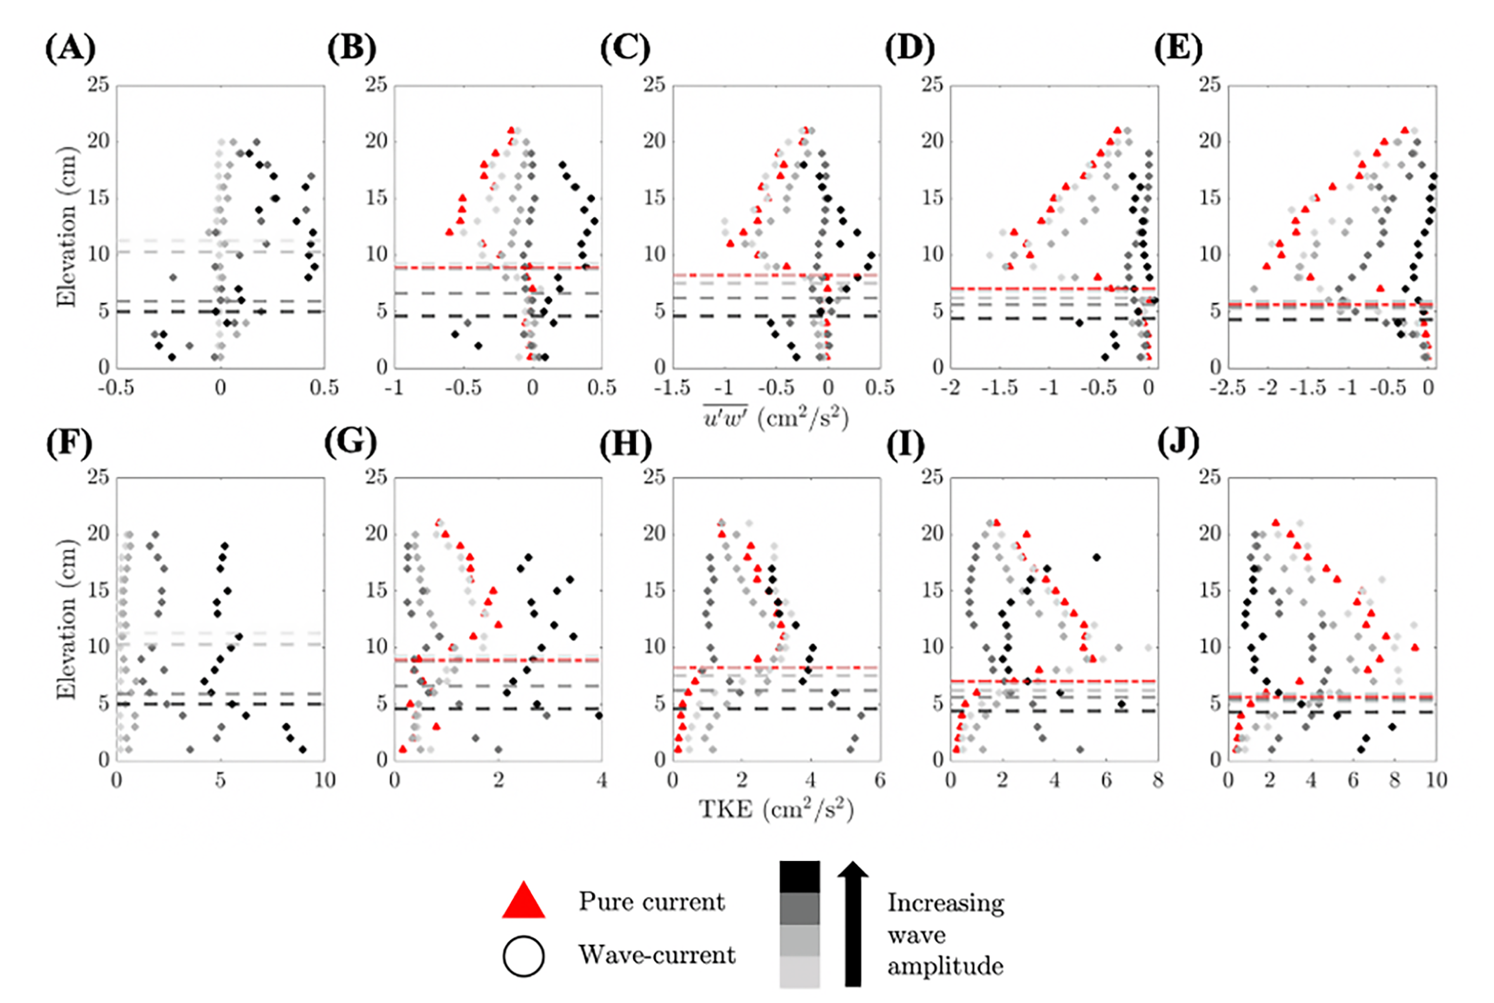


**Supplementary Figure 3.2** Distance above the bed () versus **(A-E)** Reynolds stress () and **(F-J)** turbulent kinetic energy (TKE) profiles for the depth =27 cm. The first column includes pure wave conditions, and the imposed current increases from the second through fifth columns (see **Supplementary Table 2**). Horizontal dashed lines denote measured deflected meadow height , with matching colors (dashed-dotted lines correspond to pure current cases). Profiles could not be extended over the entire depth due to limitations of the instrument and the presence of waves. Some points from cases involving the stronger two waves (black and darkest gray circles) are outside of the shown x-axes ranges in order to show the details of the other profiles.


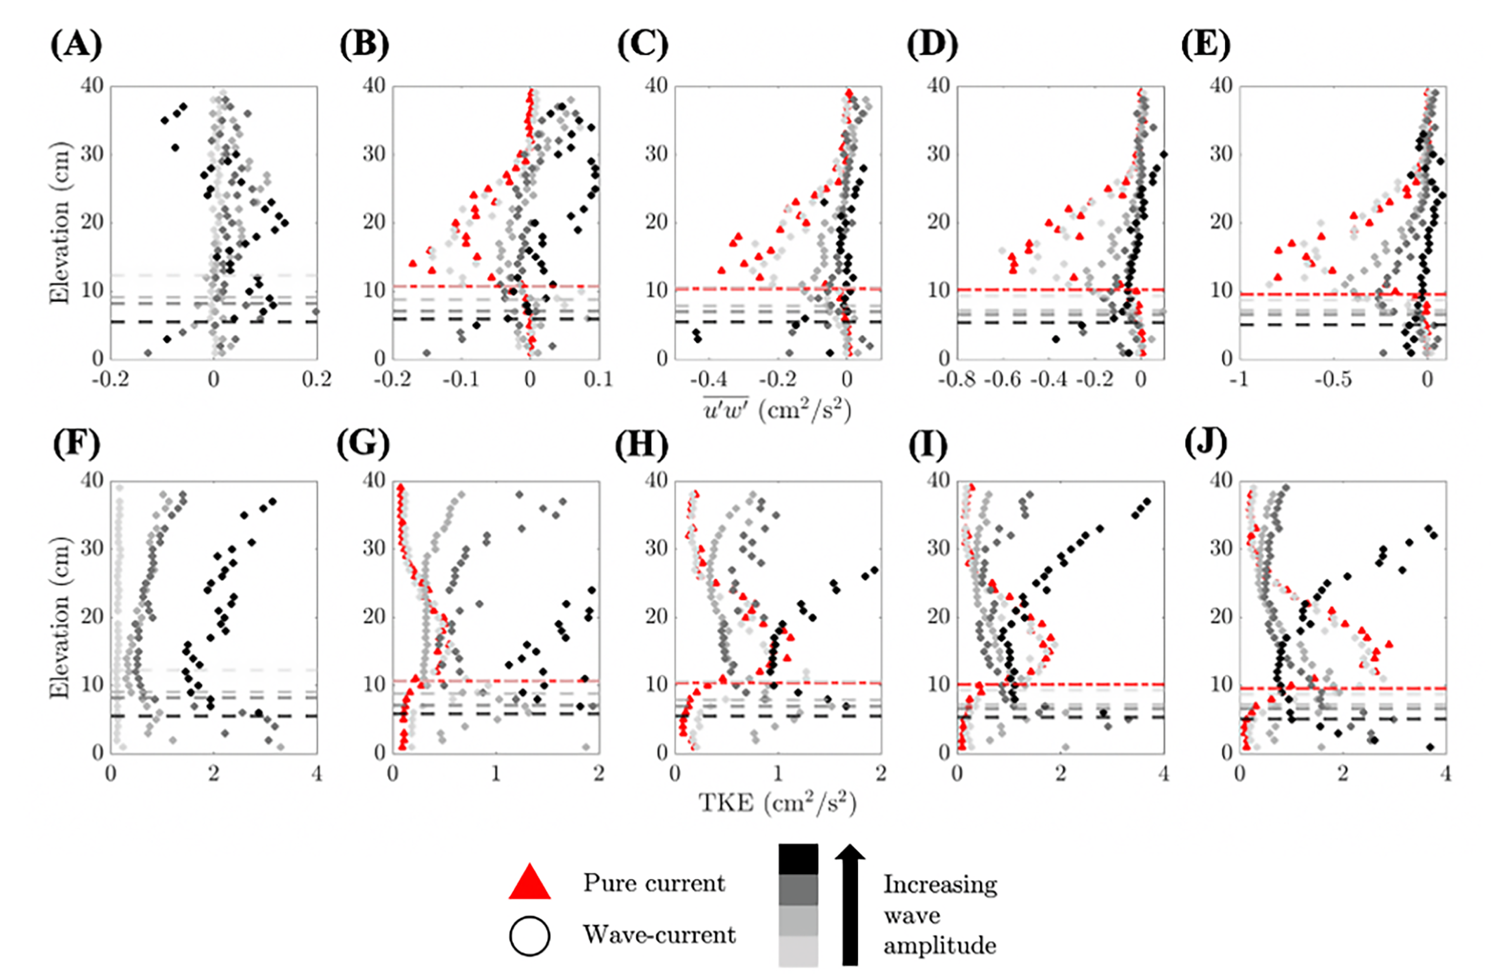


**Supplementary Figure 3.3**: **(A-E)** Distance above the bed () versus Reynolds stress () and **(F-J)** turbulent kinetic energy (TKE) profiles for the depth =45 cm. The first column includes pure wave conditions, and the imposed current increases from the second through fifth columns (see **Supplementary Table 2**). Horizontal dashed lines denote measured deflected meadow height , with matching colors (dashed-dotted lines correspond to pure current cases). Profiles could not be extended over the entire depth due to limitations of the instrument and the presence of waves. Some points from cases involving the stronger two waves (black and darkest gray circles) are outside of the shown x-axes ranges in order to show the details of the other profiles.

# Additional Figures


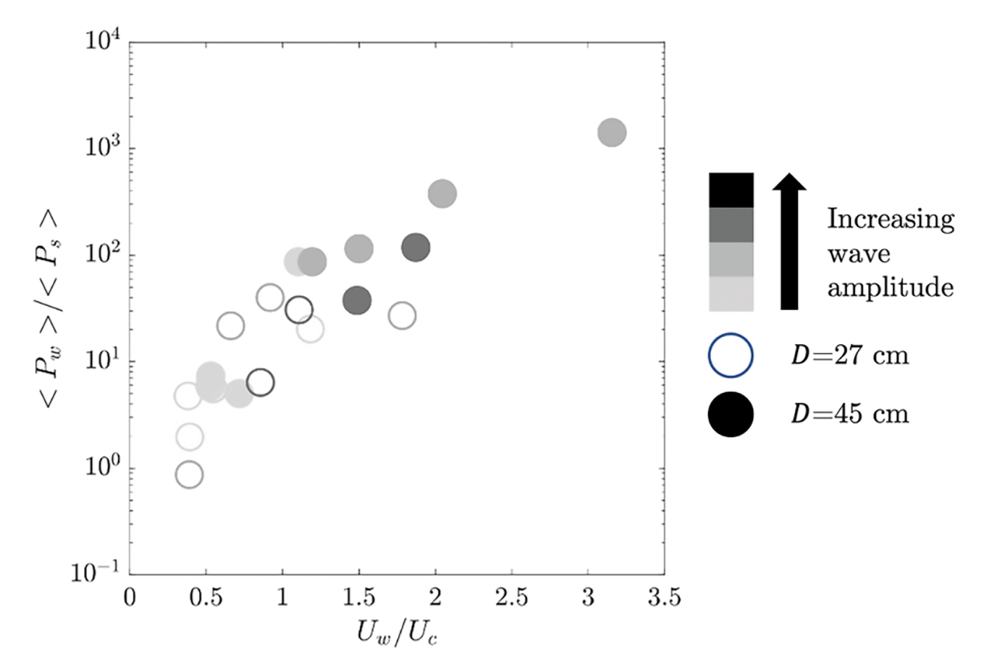


**Supplementary Figure 4.1**: Ratio of lower-bound canopy-averaged wake production () predicted using Equation 8 in the main text (using the in-canopy time-averaged velocity scale ) to canopy-averaged measured shear production () using Equation 6 in the main text versus the wave-to-current velocity ratio (), specifically for cases showing typical shear layer structure. Note the logarithmic scale on the y-axis. Ratios increased with increasing due to the decrease in Reynolds stress peak magnitude (see **Figure 5** in the main text).


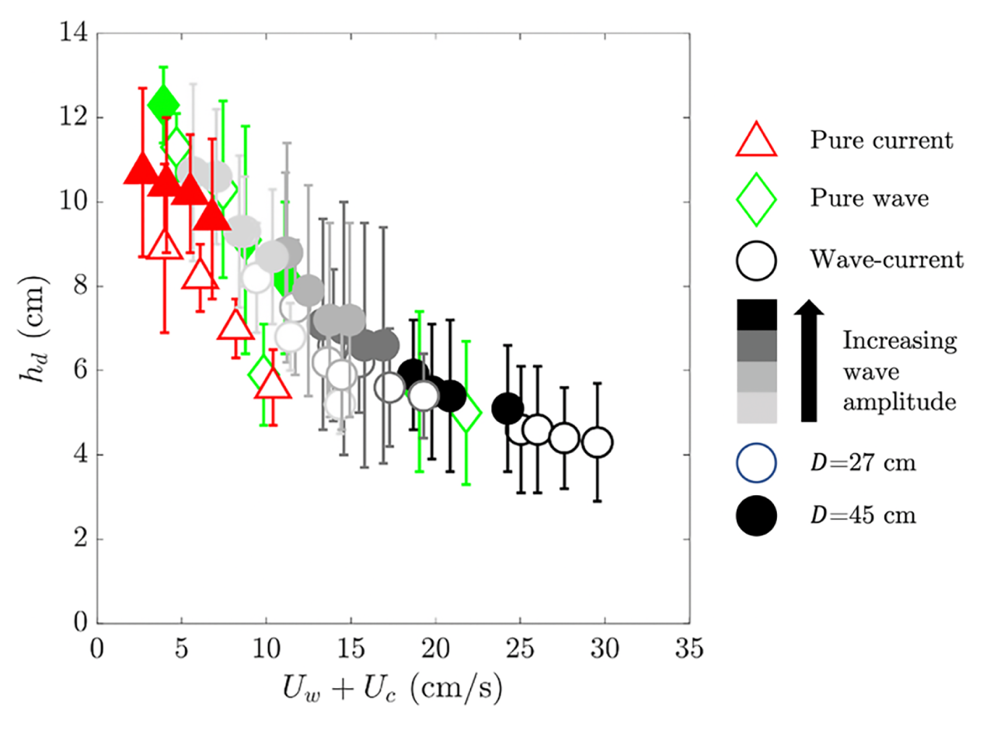


**Supplementary Figure 4.2**: Measured mean deflected height () versus the sum of the wave and current velocity () for each case. Error bars denote standard deviation. The mean deflected height decreased with increasing current velocity, and decreased with increasing wave amplitude.
